# Supplementary material for: Peripheral neuropathy and monoclonal gammopathy of undetermined significance: a population-based study including 15,351 cases and 58,619 matched controls
Source: PubMed Central journal article supplement — Haematologica. 2020 Feb 13;105(11):2679–81. doi: 10.3324/haematol.2019.239632 (PMC7604635; doi:10.3324/haematol.2019.239632), 2020-02-13
Supplement: 2019_239632-Disclosures_Contributions.pdf [file 2019_239632-Disclosures_Contributions.pdf]

Haematologica  
HAEMATOL/2019/239632  
Version 4

Peripheral neuropathy and monoclonal gammopathy of undetermined significance: a population-based study including 15,351 cases and 58,619 matched controls

Sæmundur Rögnvaldsson, Vilhjálmur Steingrímsson, Ingemar Turesson, Magnus Björkholm, Óla Landgren, and Sigurður Yngvi Kristinsson

Disclosures: Funding: This research was supported by grants from the University of Iceland Research Fund, Icelandic Centre for Research (RANNIS), Landspítali University Hospital Research Fund, and Karolinska Institutet Foundations. For OL: funding support for this publication was provided by the Memorial Sloan Kettering Core Grant (P30 CA008748) and the Perelman Family Foundation in collaboration with the Multiple Myeloma Research Foundation (MMRF). SR is a PhD candidate at the University of Iceland and this work is submitted in partial fulfilment of the requirement for a PhD. Other disclosures: OL has received research funding from: National Institutes of Health (NIH), U.S. Food and Drug Administration (FDA), Multiple Myeloma Research Foundation (MMRF), International Myeloma Foundation (IMF), Leukemia and Lymphoma Society (LLS), Perelman Family Foundation, Rising Tides Foundation, Amgen, Celgene, Janssen, Takeda, Glenmark, Seattle Genetics, Karyopharm; Honoraria/ad boards: Adaptive, Amgen, Binding Site, BMS, Celgene, Cellectis, Glenmark, Janssen, Juno, Pfizer; and serves on Independent Data Monitoring Committees (IDMCs) for clinical trials lead by Takeda, Merck, Janssen. SYK has received research funding from: The International Myeloma Foundation (IMF), Amgen, and Celgene. Other authors have no relevant conflicts-of-interest to disclose.

Contributions: SYK and SR designed the study and obtained data. SR performed the analyses. Additional design input was provided by VS. SR, SYK, VS, MB, IT, and OL were involved in the analyses and the interpretation of the results, read and gave comments, and approved the final manuscript written by SR. All authors had access to the data in the study and take responsibility for the integrity of the data and accuracy of the data analysis.
